# Supplementary material for: Modeling of the axon membrane skeleton structure and implications for its mechanical properties
Source: PubMed Central journal article supplement (PMC5348042; doi:10.1371/journal.pcbi.1005407), 2017-02-27
Supplement: pcbi.1005407.s019.pdf [file pcbi.1005407.s019.pdf]

**S2 Table. Values of  $B (\times 10^{-3})$  for Young's modulus  $E$  ranging from 1~10 kPa and thicknesses  $h$  from 5~10 nm.**

| $E$ (kPa)<br>$h$ (nm) | 1    | 2    | 3     | 4     | 5     | 6     | 7     | 8     | 9     | 10    |
|-----------------------|------|------|-------|-------|-------|-------|-------|-------|-------|-------|
| 5                     | 3.45 | 5.23 | 9.11  | 11.02 | 14.68 | 15.53 | 19.43 | 23.13 | 24.61 | 29.86 |
| 6                     | 3.89 | 5.92 | 10.28 | 12.43 | 16.56 | 17.52 | 21.92 | 26.12 | 27.78 | 33.68 |
| 7                     | 4.24 | 6.43 | 11.20 | 13.55 | 18.05 | 19.10 | 23.89 | 28.44 | 30.27 | 36.72 |
| 8                     | 4.92 | 7.43 | 12.93 | 15.64 | 20.84 | 22.05 | 27.59 | 32.84 | 34.94 | 42.40 |
| 9                     | 5.21 | 7.89 | 13.75 | 16.64 | 22.16 | 23.45 | 29.33 | 34.92 | 37.16 | 45.08 |
| 10                    | 5.42 | 8.21 | 14.31 | 17.33 | 23.04 | 24.38 | 30.51 | 36.32 | 38.64 | 46.92 |
