# Supplementary material for: Modeling of the axon membrane skeleton structure and implications for its mechanical properties
Source: PubMed Central journal article supplement (PMC5348042; doi:10.1371/journal.pcbi.1005407), 2017-02-27
Supplement: pcbi.1005407.s020.pdf [file pcbi.1005407.s020.pdf]

**S3 Table. Values of  $\beta$  for Young's modulus  $E$  ranging from 1~10 kPa and thicknesses  $h$  from 5~10 nm.**

| $E$ (kPa)<br>$h$ (nm) | 1      | 2      | 3      | 4      | 5      | 6      | 7      | 8      | 9      | 10     |
|-----------------------|--------|--------|--------|--------|--------|--------|--------|--------|--------|--------|
| 5                     | 1.3392 | 1.3429 | 1.3375 | 1.3395 | 1.3412 | 1.3387 | 1.3376 | 1.3392 | 1.3411 | 1.3396 |
| 6                     | 1.3416 | 1.3428 | 1.3432 | 1.3415 | 1.3434 | 1.3421 | 1.3425 | 1.3436 | 1.3413 | 1.3425 |
| 7                     | 1.3479 | 1.3482 | 1.3472 | 1.3479 | 1.3478 | 1.3482 | 1.3481 | 1.3456 | 1.3427 | 1.3483 |
| 8                     | 1.3528 | 1.3521 | 1.3529 | 1.3518 | 1.3522 | 1.3516 | 1.3526 | 1.3572 | 1.3528 | 1.3564 |
| 9                     | 1.3654 | 1.3652 | 1.3658 | 1.3656 | 1.3655 | 1.3652 | 1.3664 | 1.3687 | 1.3647 | 1.3683 |
| 10                    | 1.3659 | 1.3742 | 1.3657 | 1.3643 | 1.3683 | 1.3715 | 1.3695 | 1.3658 | 1.3724 | 1.3762 |
